# Supplementary material for: Ultra-trace determination of thallium by electrochemical hydride generation using efficient tungsten electrodes followed by in situ trapping on a graphite tube and detection by electrothermal atomic absorption spectrometry
Source: Royal Society of Chemistry journal article supplement (doi:10.1039/c7ja00145b), 2017-01-01

## Supporting Information

### **Ultra-trace determination of thallium by electrochemical hydride generation using efficient tungsten electrodes followed by in situ trapping on a graphite tube and detection by electrothermal atomic absorption spectrometry**

Alireza Shams<sup>a</sup>, Narges Ashraf<sup>\*,a</sup>, Mohammad Hossein Arbab-Zavar<sup>a</sup>, Mahboubeh Masrournia<sup>b</sup>

<sup>a</sup> *Department of Chemistry, Faculty of Sciences, Ferdowsi University of Mashhad, Mashhad, Iran*

<sup>b</sup> *Department of Chemistry, Mashhad Branch, Islamic Azad University, Mashhad, Iran*

*\* Corresponding author:ashraf-n@um.ac.ir*

Fig. S-1: The photo of ECHG system

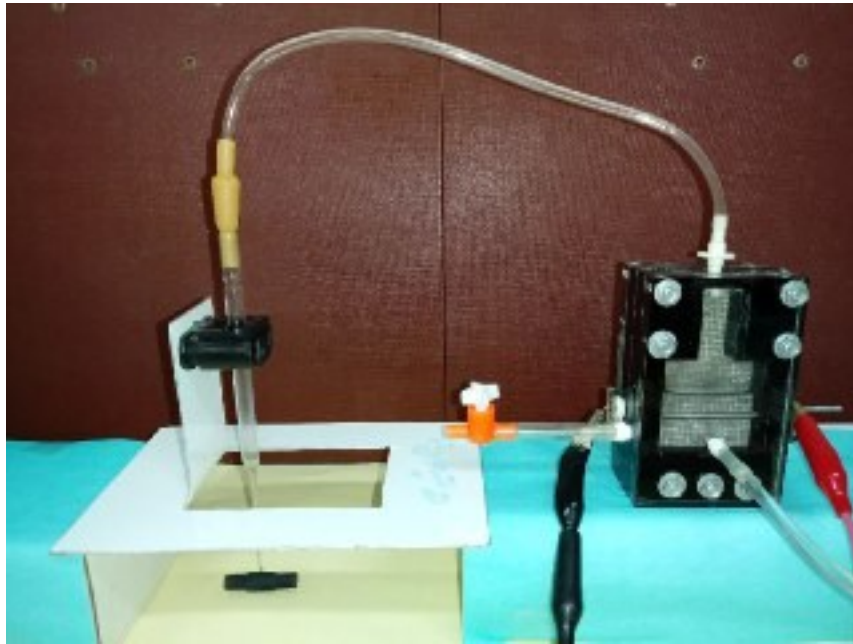

Table S-1: Graphite furnace temperature program applied for modification of graphite tube with lanthanum.

| <b>Step</b>        | <b>Start temp. (°C)</b> | <b>End temp. (°C)</b> | <b>Ramp time (s)</b> | <b>Hold time (s)</b> | <b>Ar flow rate (mL/min)</b> |
|--------------------|-------------------------|-----------------------|----------------------|----------------------|------------------------------|
| <b>Drying</b>      | 80                      | 150                   | 40                   | 0                    | 200                          |
| <b>Ashing</b>      | 400                     | 800                   | 20                   | 0                    | 200                          |
| <b>Atomization</b> | 1400                    | 1400                  | 0                    | 3                    | 0                            |
| <b>Cooling</b>     | 0                       | 0                     | 0                    | 10                   | 200                          |

Fig. S-2: EDX spectra of the surfaces of the electrode. (A) new electrode, (B) after 10 experiments (C) after 100 experiments.

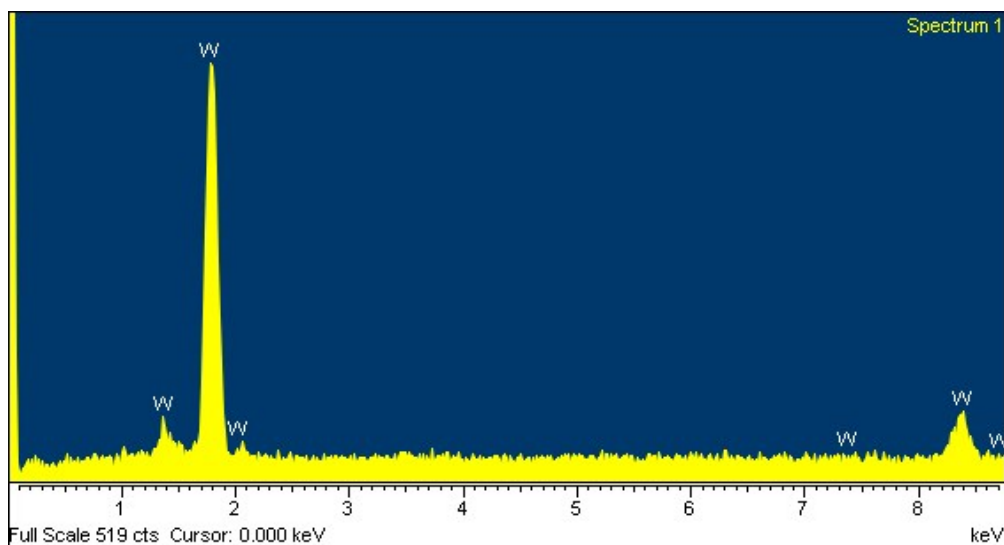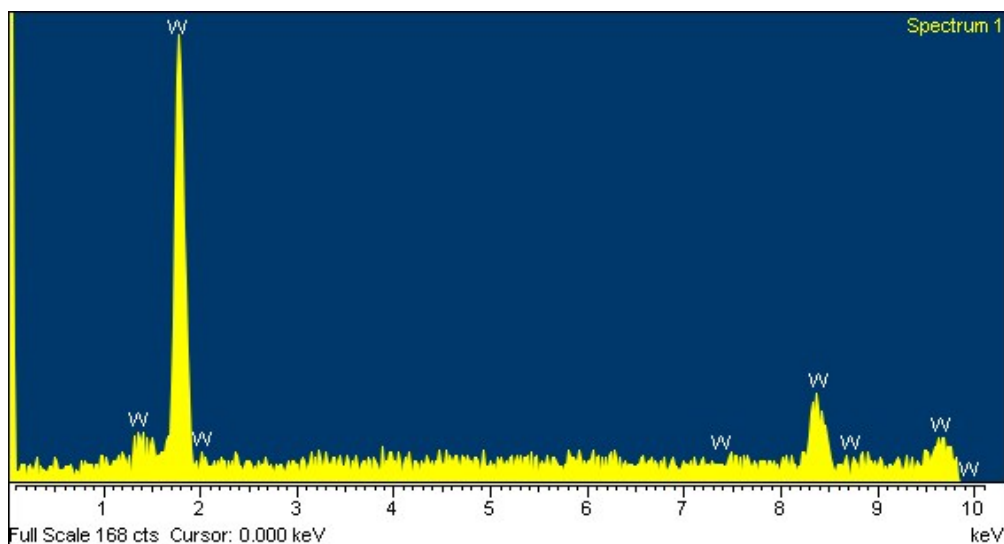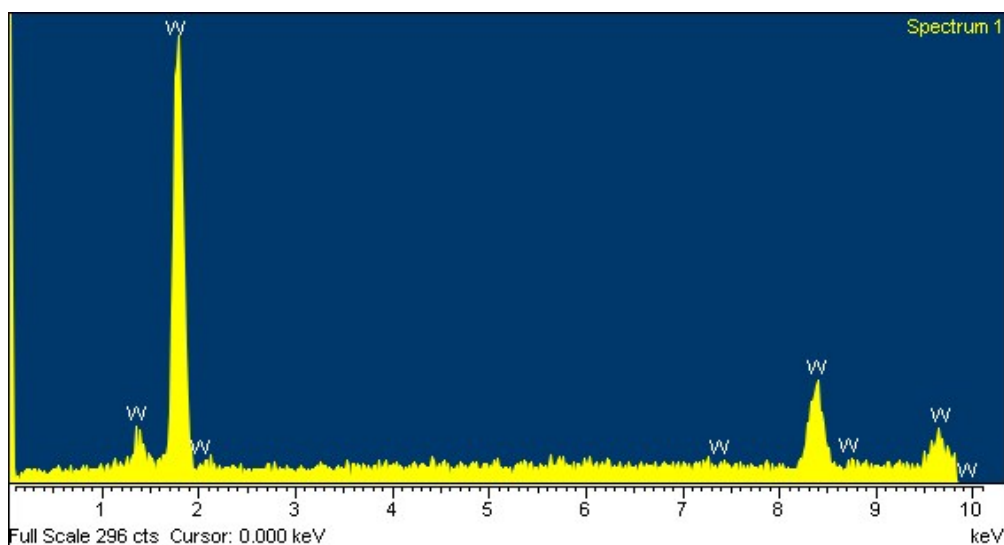

Fig. S-3: The absorbance vs. time plots obtained by applying Pb HCL, Sn HCL, W HCL and Tl HCL. Concentration of Tl(I): 250 ng L<sup>-1</sup>. In the case of Pb and Sn signals, the applied cathode was Sn-Pb alloy. All other conditions was set at the optimum values.

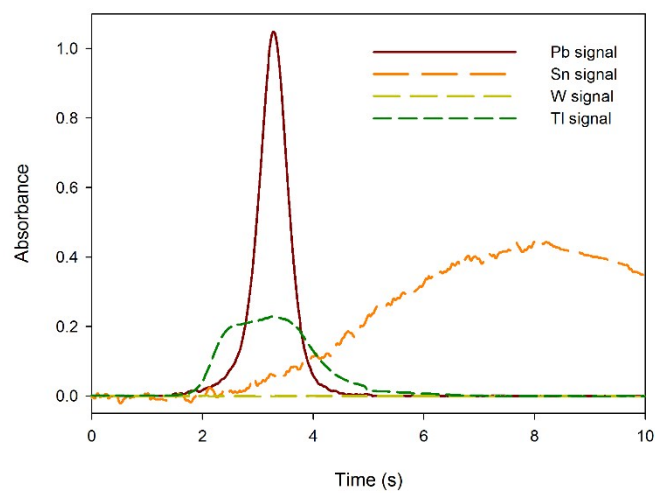

Table S-2: The levels of the factors used for screening step in the two-level Plackett–Burman design.

| <b>Parameter</b>                                    | <b>Low level</b> | <b>High level</b> |
|-----------------------------------------------------|------------------|-------------------|
| <b>Atomizing temperature (°C)</b>                   | 1500             | 2300              |
| <b>Trapping temperature (°C)</b>                    | 150              | 450               |
| <b>Ar flow rate (mL min<sup>-1</sup>)</b>           | 0                | 100               |
| <b>Catholyte concentration (mol L<sup>-1</sup>)</b> | 0.001            | 0.01              |
| <b>Anolyte concentration (mol L<sup>-1</sup>)</b>   | 0.1              | 0.5               |
| <b>Electrolytic current (A)</b>                     | 0.1              | 0.2               |
| <b>Electrolysis time (s)</b>                        | 150              | 300               |
| <b>Carrier gas flow rate (mL min<sup>-1</sup>)</b>  | 20               | 50                |

Fig S-4: The statistical evaluation of the obtained results using the Pareto chart with a minimum t-value of 3.182 at a confidence level of 95.0%. Concentration of Tl(I): 1000 ng L<sup>-1</sup>.

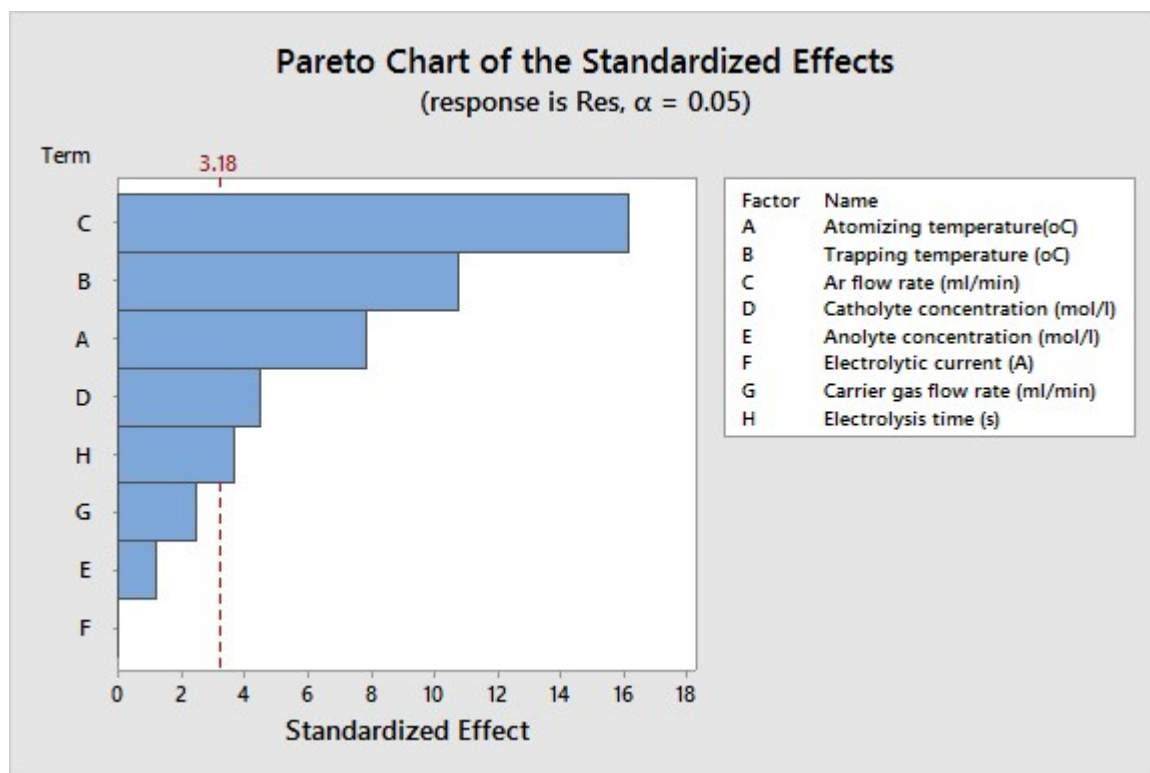

Supplement: c7ja00145b1.pdf [file c7ja00145b1.pdf]
